# Supplementary material
Source: HighWire-hosted journal article supplement (https://www.jneurosci.org/content/40/9/1931)
Supplement: inline-supplementary-material-1 [file inline-supplementary-material-1.docx]

Table 1-1. Grouping variables and dataset composition for the N=268 sample.

| **RID** | **pTau** | **Aβ1-42** | **pTau/Aβ1-42** | **Aging Phenotype** | **APOE Genotype** | **sMRI** | **GE** |
| --- | --- | --- | --- | --- | --- | --- | --- |
| *S_0056 | 15.18 | 1198 | 0.01267 | Neurotypical | ε4- | 1 | 1 |
| *S_0059 | 16.22 | 1616 | 0.01004 | Neurotypical | ε4- | 1 | 1 |
| *S_0089 | 14.62 | 1278 | 0.01144 | Neurotypical | ε4- | 1 | 1 |
| *S_0096 | 12.5 | 719.3 | 0.01738 | Neurotypical | ε4- | 1 |  |
| *S_0118 | 16.17 | 1338 | 0.01209 | Neurotypical | ε4- |  | 1 |
| *S_0186 | 18.55 | 846.8 | 0.02191 | Neurotypical | ε4- | 1 | 1 |
| *S_0260 | 15.77 | 1559 | 0.01012 | Neurotypical | ε4- | 1 | 1 |
| *S_0272 | 23.79 | 1431 | 0.01662 | Neurotypical | ε4- | 1 | 1 |
| *S_0416 | 17.14 | 1219 | 0.01406 | Neurotypical | ε4- | 1 | 1 |
| *S_0610 | 31.31 | 1995 | 0.01569 | Neurotypical | ε4- | 1 | 1 |
| *S_0668 | 15.31 | 1129 | 0.01356 | Neurotypical | ε4- | 1 | 1 |
| *S_0672 | 18.1 | 2241 | 0.00808 | Neurotypical | ε4- |  | 1 |
| *S_0677 | 16.45 | 1622 | 0.01014 | Neurotypical | ε4- | 1 | 1 |
| *S_0685 | 25.14 | 1632 | 0.0154 | Neurotypical | ε4- | 1 | 1 |
| *S_0923 | 21.28 | 1370 | 0.01553 | Neurotypical | ε4- | 1 | 1 |
| *S_1261 | 21.23 | 1711 | 0.01241 | Neurotypical | ε4- | 1 | 1 |
| *S_1352 | 23.02 | 2053 | 0.01121 | Neurotypical | ε4- | 1 | 1 |
| *S_2201 | 18.14 | 2282 | 0.00795 | Neurotypical | ε4- | 1 | 1 |
| *S_4010 | 14.52 | 681.8 | 0.0213 | Neurotypical | ε4- | 1 | 1 |
| *S_4018 | 22.26 | 1893 | 0.01176 | Neurotypical | ε4- | 1 | 1 |
| *S_4020 | 24.15 | 2559 | 0.00944 | Neurotypical | ε4- | 1 | 1 |
| *S_4021 | 8 | 690.2 | 0.01159 | Neurotypical | ε4- | 1 | 1 |
| *S_4028 | 23.95 | 1910 | 0.01254 | Neurotypical | ε4- | 1 | 1 |
| *S_4032 | 12.23 | 1192 | 0.01026 | Neurotypical | ε4- | 1 | 1 |
| *S_4037 | 17.76 | 1809 | 0.00982 | Neurotypical | ε4- | 1 | 1 |
| *S_4043 | 21.98 | 2232 | 0.00985 | Neurotypical | ε4- | 1 | 1 |
| *S_4050 | 12.31 | 955.7 | 0.01288 | Neurotypical | ε4- |  | 1 |
| *S_4060 | 14.75 | 737.5 | 0.02 | Neurotypical | ε4- | 1 | 1 |
| *S_4066 | 15.48 | 2183 | 0.00709 | Neurotypical | ε4- |  |  |
| *S_4076 | 15.14 | 1939 | 0.00781 | Neurotypical | ε4- | 1 |  |
| *S_4084 | 20.67 | 2349 | 0.0088 | Neurotypical | ε4- | 1 | 1 |
| *S_4086 | 8.26 | 925.1 | 0.00893 | Neurotypical | ε4- |  | 1 |
| *S_4090 | 17.53 | 1687 | 0.01039 | Neurotypical | ε4- | 1 | 1 |
| *S_4093 | 10.42 | 858.7 | 0.01213 | Neurotypical | ε4- | 1 | 1 |
| *S_4097 | 21.89 | 801.7 | 0.0273 | Neurotypical | ε4- | 1 | 1 |
| *S_4103 | 17.69 | 1432 | 0.01235 | Neurotypical | ε4- | 1 | 1 |
| *S_4104 | 13.66 | 917.4 | 0.01489 | Neurotypical | ε4- | 1 | 1 |
| *S_4105 | 11.29 | 974.3 | 0.01159 | Neurotypical | ε4- | 1 |  |
| *S_4119 | 30.31 | 1826 | 0.0166 | Neurotypical | ε4- | 1 | 1 |
| *S_4121 | 26.15 | 1345 | 0.01944 | Neurotypical | ε4- | 1 | 1 |
| *S_4139 | 10.84 | 1415 | 0.00766 | Neurotypical | ε4- | 1 |  |
| *S_4148 | 15.01 | 1352 | 0.0111 | Neurotypical | ε4- | 1 | 1 |
| *S_4150 | 19.39 | 2118 | 0.00915 | Neurotypical | ε4- | 1 | 1 |
| *S_4158 | 16.87 | 1644 | 0.01026 | Neurotypical | ε4- | 1 |  |
| *S_4164 | 19.89 | 2326 | 0.00855 | Neurotypical | ε4- | 1 | 1 |
| *S_4173 | 13.03 | 1358 | 0.00959 | Neurotypical | ε4- | 1 | 1 |
| *S_4177 | 15.28 | 924.7 | 0.01652 | Neurotypical | ε4- | 1 | 1 |
| *S_4196 | 36.31 | 1400 | 0.02594 | Neurotypical | ε4- | 1 | 1 |
| *S_4200 | 13.05 | 1544 | 0.00845 | Neurotypical | ε4- | 1 | 1 |
| *S_4208 | 16.95 | 1823 | 0.0093 | Neurotypical | ε4- | 1 | 1 |
| *S_4213 | 18.85 | 1691 | 0.01115 | Neurotypical | ε4- | 1 | 1 |
| *S_4224 | 15.43 | 1201 | 0.01285 | Neurotypical | ε4- | 1 | 1 |
| *S_4254 | 31.96 | 1194 | 0.02677 | Neurotypical | ε4- | 1 | 1 |
| *S_4269 | 17.48 | 1157 | 0.01511 | Neurotypical | ε4- | 1 | 1 |
| *S_4275 | 20.11 | 1775 | 0.01133 | Neurotypical | ε4- | 1 | 1 |
| *S_4279 | 29.37 | 2612 | 0.01124 | Neurotypical | ε4- | 1 | 1 |
| *S_4291 | 18.84 | 762 | 0.02472 | Neurotypical | ε4- | 1 | 1 |
| *S_4292 | 19.56 | 1635 | 0.01196 | Neurotypical | ε4- | 1 | 1 |
| *S_4308 | 20.34 | 2040 | 0.00997 | Neurotypical | ε4- | 1 | 1 |
| *S_4320 | 22 | 979.7 | 0.02246 | Neurotypical | ε4- | 1 | 1 |
| *S_4337 | 9.9 | 998.6 | 0.00991 | Neurotypical | ε4- | 1 | 1 |
| *S_4340 | 15.4 | 1913 | 0.00805 | Neurotypical | ε4- | 1 | 1 |
| *S_4349 | 17.82 | 995.8 | 0.0179 | Neurotypical | ε4- | 1 | 1 |
| *S_4350 | 18.8 | 1918 | 0.0098 | Neurotypical | ε4- | 1 | 1 |
| *S_4352 | 23.04 | 1882 | 0.01224 | Neurotypical | ε4- | 1 | 1 |
| *S_4357 | 19.25 | 1332 | 0.01445 | Neurotypical | ε4- | 1 | 1 |
| *S_4365 | 17.29 | 1264 | 0.01368 | Neurotypical | ε4- | 1 | 1 |
| *S_4369 | 24.56 | 2249 | 0.01092 | Neurotypical | ε4- | 1 | 1 |
| *S_4376 | 23.97 | 2108 | 0.01137 | Neurotypical | ε4- | 1 | 1 |
| *S_4382 | 32.3 | 3088 | 0.01046 | Neurotypical | ε4- | 1 | 1 |
| *S_4384 | 9.86 | 867.5 | 0.01137 | Neurotypical | ε4- | 1 | 1 |
| *S_4391 | 13.94 | 1731 | 0.00805 | Neurotypical | ε4- | 1 | 1 |
| *S_4393 | 30.8 | 2573 | 0.01197 | Neurotypical | ε4- | 1 | 1 |
| *S_4396 | 13.69 | 981.6 | 0.01395 | Neurotypical | ε4- | 1 | 1 |
| *S_4410 | 29.14 | 2019 | 0.01443 | Neurotypical | ε4- | 1 | 1 |
| *S_4421 | 17.55 | 1955 | 0.00898 | Neurotypical | ε4- | 1 | 1 |
| *S_4422 | 30.51 | 1373 | 0.02222 | Neurotypical | ε4- | 1 |  |
| *S_4427 | 20.73 | 1689 | 0.01227 | Neurotypical | ε4- | 1 | 1 |
| *S_4428 | 16.67 | 1454 | 0.01146 | Neurotypical | ε4- | 1 | 1 |
| *S_4429 | 25.29 | 2175 | 0.01163 | Neurotypical | ε4- | 1 | 1 |
| *S_4448 | 26.82 | 2426 | 0.01106 | Neurotypical | ε4- | 1 | 1 |
| *S_4449 | 17.99 | 957.1 | 0.0188 | Neurotypical | ε4- | 1 | 1 |
| *S_4453 | 19.29 | 2069 | 0.00932 | Neurotypical | ε4- | 1 | 1 |
| *S_4466 | 15.52 | 1061 | 0.01463 | Neurotypical | ε4- | 1 | 1 |
| *S_4483 | 15.26 | 1696 | 0.009 | Neurotypical | ε4- | 1 | 1 |
| *S_4485 | 25.67 | 1563 | 0.01642 | Neurotypical | ε4- | 1 |  |
| *S_4488 | 16.28 | 1641 | 0.00992 | Neurotypical | ε4- | 1 | 1 |
| *S_4491 | 14.19 | 1292 | 0.01098 | Neurotypical | ε4- | 1 | 1 |
| *S_4499 | 26.29 | 1841 | 0.01428 | Neurotypical | ε4- | 1 | 1 |
| *S_4503 | 17.1 | 1245 | 0.01373 | Neurotypical | ε4- | 1 | 1 |
| *S_4505 | 28.49 | 2385 | 0.01195 | Neurotypical | ε4- | 1 | 1 |
| *S_4508 | 17.34 | 685.5 | 0.0253 | Neurotypical | ε4- | 1 | 1 |
| *S_4516 | 19.91 | 1488 | 0.01338 | Neurotypical | ε4- | 1 | 1 |
| *S_4520 | 35.59 | 2608 | 0.01365 | Neurotypical | ε4- | 1 | 1 |
| *S_4545 | 11.89 | 1373 | 0.00866 | Neurotypical | ε4- | 1 | 1 |
| *S_4559 | 17.06 | 1969 | 0.00866 | Neurotypical | ε4- | 1 | 1 |
| *S_4560 | 18.98 | 2140 | 0.00887 | Neurotypical | ε4- | 1 | 1 |
| *S_4576 | 55.14 | 2254 | 0.02446 | Neurotypical | ε4- | 1 | 1 |
| *S_4578 | 14.28 | 2054 | 0.00695 | Neurotypical | ε4- | 1 | 1 |
| *S_4586 | 19.26 | 1744 | 0.01104 | Neurotypical | ε4- | 1 |  |
| *S_4598 | 29.77 | 2696 | 0.01104 | Neurotypical | ε4- | 1 | 1 |
| *S_4616 | 20.49 | 897.8 | 0.02282 | Neurotypical | ε4- | 1 |  |
| *S_4638 | 15.52 | 1739 | 0.00892 | Neurotypical | ε4- | 1 |  |
| *S_4643 | 16.16 | 1704 | 0.00948 | Neurotypical | ε4- | 1 | 1 |
| *S_4739 | 14.68 | 1404 | 0.01046 | Neurotypical | ε4- | 1 |  |
| *S_4762 | 9.56 | 1020 | 0.00937 | Neurotypical | ε4- | 1 |  |
| *S_4785 | 14.04 | 1661 | 0.00845 | Neurotypical | ε4- |  |  |
| *S_4795 | 9.91 | 978.2 | 0.01013 | Neurotypical | ε4- | 1 |  |
| *S_4832 | 12.92 | 1236 | 0.01045 | Neurotypical | ε4- | 1 |  |
| *S_4856 | 10.01 | 975.8 | 0.01026 | Neurotypical | ε4- | 1 |  |
| *S_4878 | 14.75 | 1768 | 0.00834 | Neurotypical | ε4- | 1 |  |
| *S_4900 | 14.92 | 1605 | 0.0093 | Neurotypical | ε4- | 1 |  |
| *S_4921 | 11.77 | 1291 | 0.00912 | Neurotypical | ε4- | 1 |  |
| *S_5023 | 23.3 | 2081 | 0.0112 | Neurotypical | ε4- | 1 |  |
| *S_5040 | 17.12 | 1879 | 0.00911 | Neurotypical | ε4- | 1 |  |
| *S_5075 | 16.84 | 1816 | 0.00927 | Neurotypical | ε4- |  |  |
| *S_5078 | 11.44 | 1321 | 0.00866 | Neurotypical | ε4- | 1 |  |
| *S_5079 | 21.78 | 2667 | 0.00817 | Neurotypical | ε4- | 1 |  |
| *S_5082 | 13.68 | 1600 | 0.00855 | Neurotypical | ε4- | 1 |  |
| *S_5091 | 24.08 | 1551 | 0.01553 | Neurotypical | ε4- | 1 |  |
| *S_5093 | 21.86 | 2060 | 0.01061 | Neurotypical | ε4- | 1 |  |
| *S_5100 | 12.93 | 1536 | 0.00842 | Neurotypical | ε4- | 1 |  |
| *S_5109 | 17.63 | 771.9 | 0.02284 | Neurotypical | ε4- | 1 |  |
| *S_5110 | 14 | 2008 | 0.00697 | Neurotypical | ε4- | 1 |  |
| *S_5113 | 17.65 | 1762 | 0.01002 | Neurotypical | ε4- | 1 |  |
| *S_5118 | 12.16 | 1210 | 0.01005 | Neurotypical | ε4- | 1 |  |
| *S_5124 | 30.81 | 2705 | 0.01139 | Neurotypical | ε4- | 1 |  |
| *S_5125 | 14.06 | 1518 | 0.00926 | Neurotypical | ε4- | 1 |  |
| *S_5140 | 9.96 | 924.7 | 0.01077 | Neurotypical | ε4- |  |  |
| *S_5141 | 18.57 | 1923 | 0.00966 | Neurotypical | ε4- | 1 |  |
| *S_5147 | 26.23 | 2124 | 0.01235 | Neurotypical | ε4- | 1 |  |
| *S_5150 | 18.88 | 1817 | 0.01039 | Neurotypical | ε4- |  |  |
| *S_5153 | 20.68 | 2239 | 0.00924 | Neurotypical | ε4- | 1 |  |
| *S_5157 | 15.83 | 1666 | 0.0095 | Neurotypical | ε4- | 1 |  |
| *S_5167 | 22.45 | 2217 | 0.01013 | Neurotypical | ε4- |  |  |
| *S_5170 | 19.64 | 1985 | 0.00989 | Neurotypical | ε4- |  |  |
| *S_5171 | 18.57 | 1596 | 0.01164 | Neurotypical | ε4- |  |  |
| *S_5175 | 16.77 | 1431 | 0.01172 | Neurotypical | ε4- |  |  |
| *S_5177 | 33.07 | 1944 | 0.01701 | Neurotypical | ε4- |  |  |
| *S_5178 | 20.96 | 1623 | 0.01291 | Neurotypical | ε4- | 1 |  |
| *S_5193 | 12.32 | 1111 | 0.01109 | Neurotypical | ε4- |  |  |
| *S_5194 | 11.81 | 1386 | 0.00852 | Neurotypical | ε4- |  |  |
| *S_5197 | 13.05 | 1142 | 0.01143 | Neurotypical | ε4- | 1 |  |
| *S_5200 | 9.63 | 1112 | 0.00866 | Neurotypical | ε4- | 1 |  |
| *S_5203 | 18.21 | 1176 | 0.01548 | Neurotypical | ε4- |  |  |
| *S_5209 | 18.18 | 1139 | 0.01596 | Neurotypical | ε4- |  |  |
| *S_5213 | 25.87 | 3012 | 0.00859 | Neurotypical | ε4- | 1 |  |
| *S_5218 | 29.58 | 2966 | 0.00997 | Neurotypical | ε4- |  |  |
| *S_5222 | 22.25 | 1754 | 0.01269 | Neurotypical | ε4- |  |  |
| *S_5228 | 21.07 | 1709 | 0.01233 | Neurotypical | ε4- | 1 |  |
| *S_5234 | 10.29 | 391.2 | 0.0263 | Neurotypical | ε4- |  |  |
| *S_5235 | 15.61 | 1234 | 0.01265 | Neurotypical | ε4- |  |  |
| *S_5242 | 27.06 | 1306 | 0.02072 | Neurotypical | ε4- | 1 |  |
| *S_5244 | 14.63 | 1681 | 0.0087 | Neurotypical | ε4- |  |  |
| *S_5248 | 10.74 | 810.6 | 0.01325 | Neurotypical | ε4- |  |  |
| *S_5259 | 17.12 | 1353 | 0.01265 | Neurotypical | ε4- |  |  |
| *S_5266 | 24.28 | 2433 | 0.00998 | Neurotypical | ε4- | 1 |  |
| *S_5271 | 28.56 | 1840 | 0.01552 | Neurotypical | ε4- |  |  |
| *S_5272 | 25.05 | 2358 | 0.01062 | Neurotypical | ε4- | 1 |  |
| *S_5279 | 16.66 | 992.8 | 0.01678 | Neurotypical | ε4- |  |  |
| *S_5280 | 10.08 | 731.8 | 0.01377 | Neurotypical | ε4- | 1 |  |
| *S_5285 | 10.79 | 955.4 | 0.01129 | Neurotypical | ε4- |  |  |
| *S_5287 | 26.11 | 2358 | 0.01107 | Neurotypical | ε4- | 1 |  |
| *S_5288 | 26.59 | 2460 | 0.01081 | Neurotypical | ε4- |  |  |
| *S_5296 | 20.9 | 1460 | 0.01432 | Neurotypical | ε4- | 1 |  |
| *S_0311 | 21.32 | 1396 | 0.01527 | Neurotypical | ε4+ | 1 | 1 |
| *S_0498 | 25.87 | 2440 | 0.0106 | Neurotypical | ε4+ | 1 | 1 |
| *S_0618 | 17.6 | 1261 | 0.01396 | Neurotypical | ε4+ | 1 | 1 |
| *S_4003 | 28.47 | 1274 | 0.02235 | Neurotypical | ε4+ | 1 | 1 |
| *S_4075 | 25.94 | 2093 | 0.01239 | Neurotypical | ε4+ | 1 | 1 |
| *S_4082 | 22.53 | 1616 | 0.01394 | Neurotypical | ε4+ | 1 | 1 |
| *S_4125 | 14.88 | 1685 | 0.00883 | Neurotypical | ε4+ | 1 |  |
| *S_4198 | 19.27 | 712.2 | 0.02706 | Neurotypical | ε4+ | 1 | 1 |
| *S_4276 | 21.92 | 2335 | 0.00939 | Neurotypical | ε4+ | 1 | 1 |
| *S_4313 | 14.48 | 1244 | 0.01164 | Neurotypical | ε4+ | 1 | 1 |
| *S_4348 | 18.37 | 798.6 | 0.023 | Neurotypical | ε4+ | 1 | 1 |
| *S_4367 | 20.11 | 938.8 | 0.02142 | Neurotypical | ε4+ | 1 | 1 |
| *S_4371 | 24.15 | 957.2 | 0.02523 | Neurotypical | ε4+ | 1 | 1 |
| *S_4387 | 21.77 | 1099 | 0.01981 | Neurotypical | ε4+ | 1 | 1 |
| *S_4399 | 19.62 | 1554 | 0.01263 | Neurotypical | ε4+ | 1 | 1 |
| *S_4401 | 32.26 | 1867 | 0.01728 | Neurotypical | ε4+ | 1 | 1 |
| *S_4424 | 14.6 | 752.9 | 0.01939 | Neurotypical | ε4+ | 1 | 1 |
| *S_4464 | 17.47 | 840.8 | 0.02078 | Neurotypical | ε4+ | 1 | 1 |
| *S_4469 | 34.16 | 3384 | 0.01009 | Neurotypical | ε4+ | 1 | 1 |
| *S_4496 | 28.25 | 3462 | 0.00816 | Neurotypical | ε4+ | 1 | 1 |
| *S_4552 | 19.97 | 1241 | 0.01609 | Neurotypical | ε4+ | 1 | 1 |
| *S_4585 | 18.76 | 1435 | 0.01307 | Neurotypical | ε4+ | 1 |  |
| *S_4599 | 15.8 | 772.8 | 0.02045 | Neurotypical | ε4+ | 1 |  |
| *S_4604 | 14.03 | 1279 | 0.01097 | Neurotypical | ε4+ | 1 | 1 |
| *S_4612 | 13.89 | 499.5 | 0.02781 | Neurotypical | ε4+ | 1 | 1 |
| *S_4644 | 17.36 | 1778 | 0.00976 | Neurotypical | ε4+ | 1 |  |
| *S_4951 | 12.12 | 1024 | 0.01184 | Neurotypical | ε4+ | 1 |  |
| *S_4952 | 17.18 | 2429 | 0.00707 | Neurotypical | ε4+ | 1 |  |
| *S_5083 | 15.92 | 1002 | 0.01589 | Neurotypical | ε4+ | 1 |  |
| *S_5102 | 24.23 | 1406 | 0.01723 | Neurotypical | ε4+ | 1 |  |
| *S_5130 | 13.47 | 1687 | 0.00798 | Neurotypical | ε4+ | 1 |  |
| *S_5148 | 27.45 | 1378 | 0.01992 | Neurotypical | ε4+ |  |  |
| *S_5154 | 15.71 | 1159 | 0.01355 | Neurotypical | ε4+ |  |  |
| *S_5159 | 14.96 | 1506 | 0.00993 | Neurotypical | ε4+ |  |  |
| *S_5169 | 26.06 | 1490 | 0.01749 | Neurotypical | ε4+ | 1 |  |
| *S_5176 | 18.08 | 867 | 0.02085 | Neurotypical | ε4+ |  |  |
| *S_5195 | 32.99 | 2571 | 0.01283 | Neurotypical | ε4+ | 1 |  |
| *S_5198 | 12.79 | 833.6 | 0.01534 | Neurotypical | ε4+ |  |  |
| *S_5219 | 28.83 | 1145 | 0.02518 | Neurotypical | ε4+ | 1 |  |
| *S_5230 | 22.84 | 1006 | 0.0227 | Neurotypical | ε4+ | 1 |  |
| *S_5243 | 14.2 | 1528 | 0.00929 | Neurotypical | ε4+ | 1 |  |
| *S_5253 | 18.55 | 1914 | 0.00969 | Neurotypical | ε4+ |  |  |
| *S_5269 | 10.55 | 590.4 | 0.01787 | Neurotypical | ε4+ |  |  |
| *S_5278 | 31.48 | 1336 | 0.02356 | Neurotypical | ε4+ |  |  |
| *S_5282 | 15.63 | 558.9 | 0.02797 | Neurotypical | ε4+ |  |  |
| *S_5289 | 15.79 | 1665 | 0.00948 | Neurotypical | ε4+ | 1 |  |
| *S_5295 | 8.53 | 416.8 | 0.02047 | Neurotypical | ε4+ |  |  |
| *S_0031 | 31.75 | 923.7 | 0.03437 | Preclinical | ε4- | 1 | 1 |
| *S_0173 | 34.01 | 919.6 | 0.03698 | Preclinical | ε4- | 1 | 1 |
| *S_0479 | 23.55 | 555.8 | 0.04237 | Preclinical | ε4- | 1 | 1 |
| *S_0731 | 43.05 | 657.5 | 0.06548 | Preclinical | ε4- | 1 | 1 |
| *S_1016 | 28.15 | 751.1 | 0.03748 | Preclinical | ε4- | 1 | 1 |
| *S_4014 | 30.92 | 443.5 | 0.06972 | Preclinical | ε4- | 1 | 1 |
| *S_4026 | 18.33 | 509.2 | 0.036 | Preclinical | ε4- | 1 | 1 |
| *S_4080 | 28.08 | 950.6 | 0.02954 | Preclinical | ε4- | 1 | 1 |
| *S_4100 | 28.58 | 889.9 | 0.03212 | Preclinical | ε4- | 1 | 1 |
| *S_4120 | 30.52 | 666.1 | 0.04582 | Preclinical | ε4- | 1 | 1 |
| *S_4151 | 17.85 | 492.7 | 0.03623 | Preclinical | ε4- | 1 |  |
| *S_4335 | 16.11 | 203 | 0.07936 | Preclinical | ε4- | 1 | 1 |
| *S_4343 | 53.38 | 695.5 | 0.07675 | Preclinical | ε4- | 1 |  |
| *S_4386 | 48.1 | 1221 | 0.03939 | Preclinical | ε4- | 1 | 1 |
| *S_4474 | 36.17 | 507.2 | 0.07131 | Preclinical | ε4- | 1 | 1 |
| *S_4482 | 59.99 | 1244 | 0.04822 | Preclinical | ε4- | 1 | 1 |
| *S_4637 | 19.09 | 351.4 | 0.05433 | Preclinical | ε4- | 1 | 1 |
| *S_4645 | 21.56 | 539.1 | 0.03999 | Preclinical | ε4- | 1 | 1 |
| *S_4688 | 31.12 | 1003 | 0.03103 | Preclinical | ε4- | 1 |  |
| *S_4835 | 26.62 | 728.6 | 0.03654 | Preclinical | ε4- | 1 |  |
| *S_5142 | 30.29 | 849.9 | 0.03564 | Preclinical | ε4- | 1 |  |
| *S_5199 | 15.72 | 467.1 | 0.03365 | Preclinical | ε4- |  |  |
| *S_5204 | 32.55 | 959.5 | 0.03392 | Preclinical | ε4- |  |  |
| *S_5236 | 40.99 | 1141 | 0.03592 | Preclinical | ε4- |  |  |
| *S_5258 | 26.32 | 869.7 | 0.03026 | Preclinical | ε4- | 1 |  |
| *S_5265 | 24.78 | 466.1 | 0.05316 | Preclinical | ε4- | 1 |  |
| *S_5292 | 36.39 | 928.3 | 0.0392 | Preclinical | ε4- | 1 |  |
| *S_0295 | 42.87 | 621.9 | 0.06893 | Preclinical | ε4+ | 1 |  |
| *S_4081 | 22.37 | 715.5 | 0.03126 | Preclinical | ε4+ | 1 | 1 |
| *S_4174 | 26.77 | 734.6 | 0.03644 | Preclinical | ε4+ | 1 | 1 |
| *S_4176 | 46.98 | 1156 | 0.04064 | Preclinical | ε4+ | 1 | 1 |
| *S_4179 | 20.71 | 301.5 | 0.06869 | Preclinical | ε4+ | 1 | 1 |
| *S_4225 | 38.07 | 713.7 | 0.05334 | Preclinical | ε4+ | 1 | 1 |
| *S_4266 | 33.22 | 820.1 | 0.04051 | Preclinical | ε4+ | 1 | 1 |
| *S_4270 | 19.03 | 479.7 | 0.03967 | Preclinical | ε4+ | 1 | 1 |
| *S_4278 | 19.33 | 422.8 | 0.04572 | Preclinical | ε4+ | 1 |  |
| *S_4290 | 30.12 | 510.8 | 0.05897 | Preclinical | ε4+ | 1 | 1 |
| *S_4339 | 27.13 | 481.2 | 0.05638 | Preclinical | ε4+ | 1 | 1 |
| *S_4385 | 12.76 | 220.6 | 0.05784 | Preclinical | ε4+ | 1 | 1 |
| *S_4433 | 33.76 | 486.5 | 0.06939 | Preclinical | ε4+ | 1 | 1 |
| *S_4442 | 51.24 | 425.6 | 0.12039 | Preclinical | ε4+ | 1 | 1 |
| *S_4580 | 25.42 | 857 | 0.02966 | Preclinical | ε4+ | 1 | 1 |
| *S_4587 | 24.38 | 686.4 | 0.03552 | Preclinical | ε4+ | 1 |  |
| *S_5127 | 21.87 | 469.2 | 0.04661 | Preclinical | ε4+ | 1 |  |
| *S_5129 | 33.16 | 803.1 | 0.04129 | Preclinical | ε4+ |  |  |
| *S_5185 | 45.64 | 662.8 | 0.06886 | Preclinical | ε4+ | 1 |  |
| *S_5202 | 21.4 | 545.3 | 0.03924 | Preclinical | ε4+ | 1 |  |
| *S_5227 | 50.76 | 648.9 | 0.07822 | Preclinical | ε4+ |  |  |
| *S_5237 | 38.08 | 951.8 | 0.04001 | Preclinical | ε4+ |  |  |
| *S_5256 | 36.38 | 923.3 | 0.0394 | Preclinical | ε4+ | 1 |  |
| *S_5261 | 19.03 | 568.5 | 0.03347 | Preclinical | ε4+ |  |  |
| *S_5263 | 52.28 | 684.4 | 0.07639 | Preclinical | ε4+ |  |  |
| *S_5267 | 31.2 | 1086 | 0.02873 | Preclinical | ε4+ |  |  |
| *S_5277 | 34.39 | 780.3 | 0.04407 | Preclinical | ε4+ | 1 |  |
| *S_5283 | 19.88 | 600.5 | 0.03311 | Preclinical | ε4+ |  |  |
| *S_5290 | 53.3 | 899.4 | 0.05926 | Preclinical | ε4+ |  |  |
| RID = subject-specific ADNI research identification number, pTau = cerebrospinal fluid (CSF) measures of p-Tau181p = Tau phosphorylated at threonine181, Aβ = amyloid Beta 1 to 42 peptide. The Ageing Phenotype is based on the intersection of CSF pTau/Aβ and an ADNI diagnosis during the study interval as cognitively normal: Neurotypical = pTau/Aβ < 0.028; Preclinical = pTau/Aβ ≥ 0.028. The APOE genotype grouping is delineated by presence/absence of an ε4 allele: ε4– = non-carrier; ε4+ = carrier. sMRI = structural MRI data: A value of 1 indicates that the subject had longitudinal sMRI data available. GE = gene expression data: A value of 1 indicates that the subject had microarray data available. | | | | | | | |
